# Supplementary material for: Electrochemical biosensors utilising electron transfer in heme proteins immobilised on Fe3O4nanoparticles
Source: Royal Society of Chemistry journal article supplement (doi:10.1039/b308242c), 2003-01-01
Supplement: figures.doc [file figures.doc]

This journal is © The Royal Society of Chemistry 2003


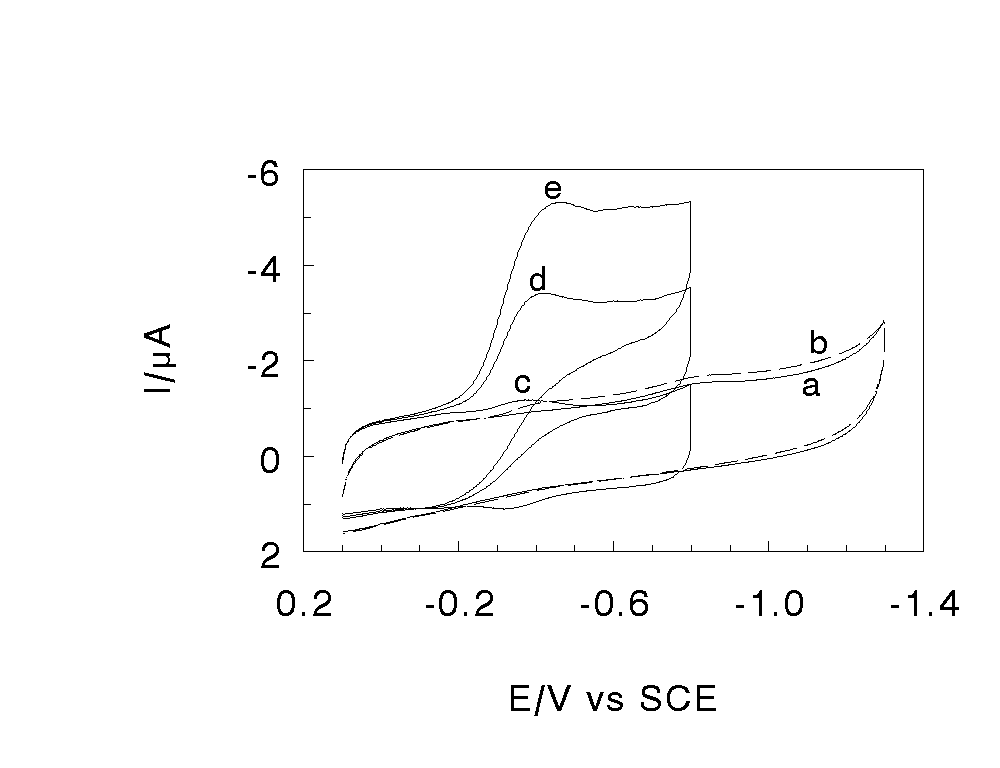


Fig. S1. Cyclic voltammograms at 0.2 V s-1 at pH 7.0 buffers for (a) Fe3O4 films in buffers containing no H2O2, (b) Fe3O4 films in buffers containing 0.031 mM H2O2, (c) HRP-Fe3O4 films in buffers containing no H2O2, (d) HRP-Fe3O4 films in buffers containing 0.022 mM H2O2, and (e) HRP-Fe3O4 films in buffers containing 0.044 mM H2O2.


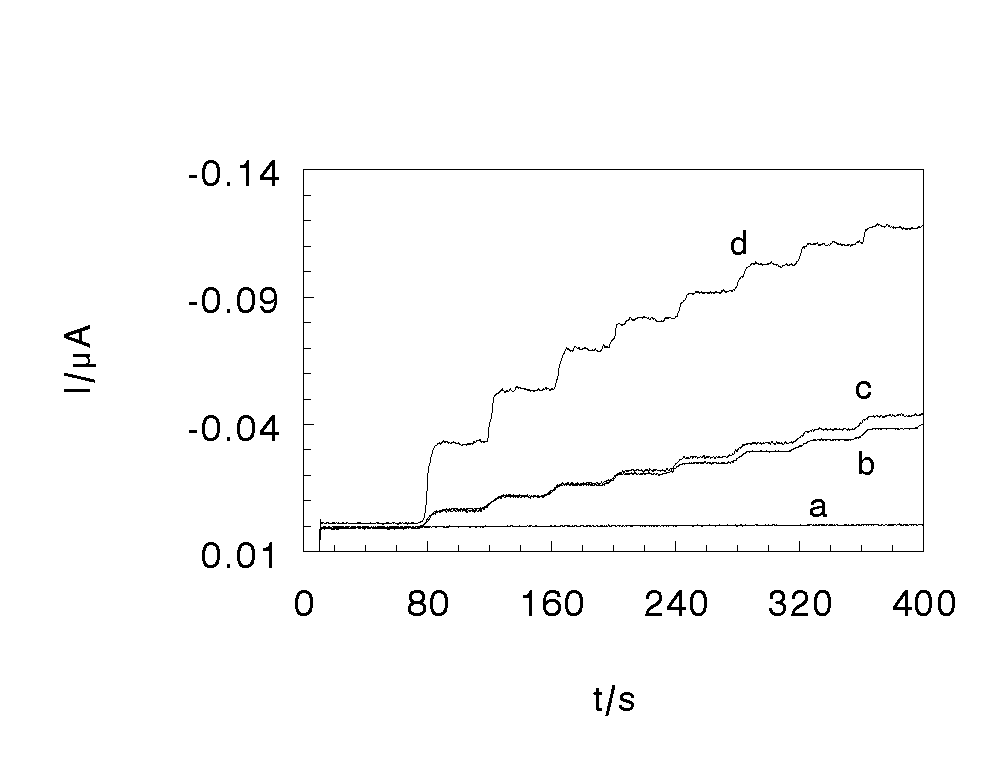


Fig. S2. Amperometric current-time curves at constant potential of 0 V in pH 7.0 buffers with injection of H2O2 every 40 s for (a) Fe3O4 films, (b) Mb-Fe3O4 films, (c) Hb-Fe3O4 films, and (d) HRP-Fe3O4 films. For (a), (b), and (c), each step corresponds to an increase of 80 M H2O2 in buffers, while for (d), each step corresponds to an increase of 2 M H2O2 in buffers.


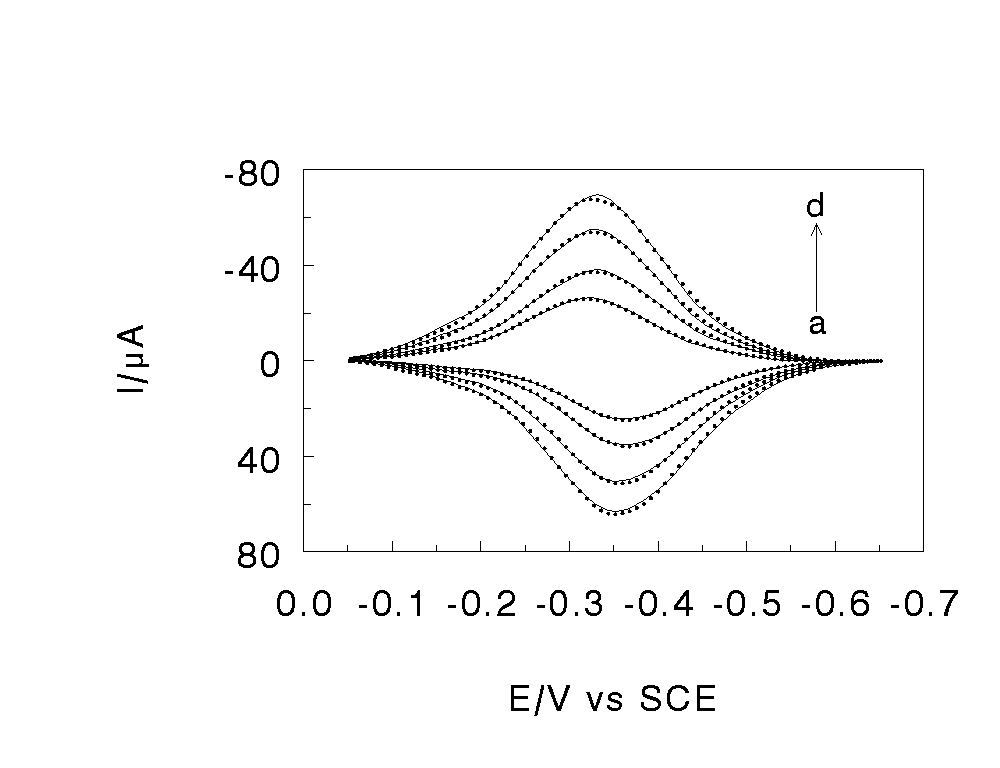


Fig. S3. Square wave forward and reverse current voltammograms for Hb-Fe3O4 films in pH 7.0 buffer solutions at different frequencies. Points represent the experimental SWVs from which background has been subtracted. The solid lines are the best fit by nonlinear regression onto the 5-E dispersion model. SWV conditions: pulse height 75 mV, step height 4 mV, and frequencies (Hz): (a) 100; (b) 125; (c) 152; (d) 179.


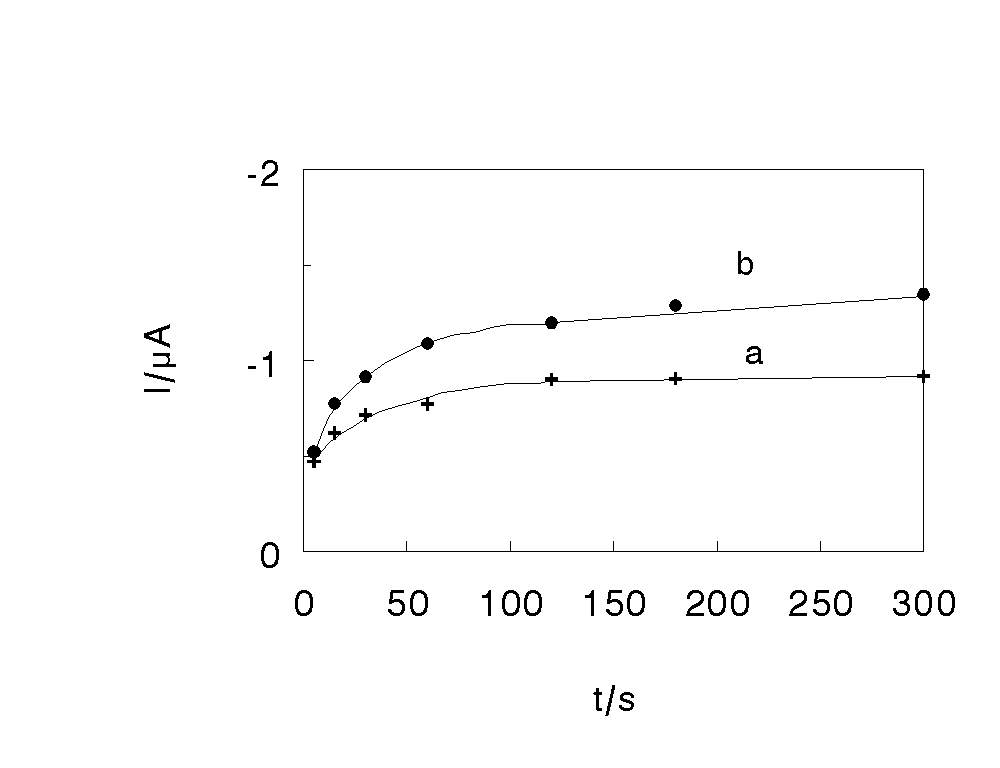


Fig. S4. Effect of immersing time on CV reduction peak current at 0.2 V s-1 for Fe3O4 film electrodes immersed in (a) pH 7.0 buffers containing 0.05 M KH2PO4, 0.1 M KBr and 1 mg ml-1 Hb and (b) pH 7.0 buffers containing 0.01 M KH2PO4 and 1 mg ml-1 Hb.


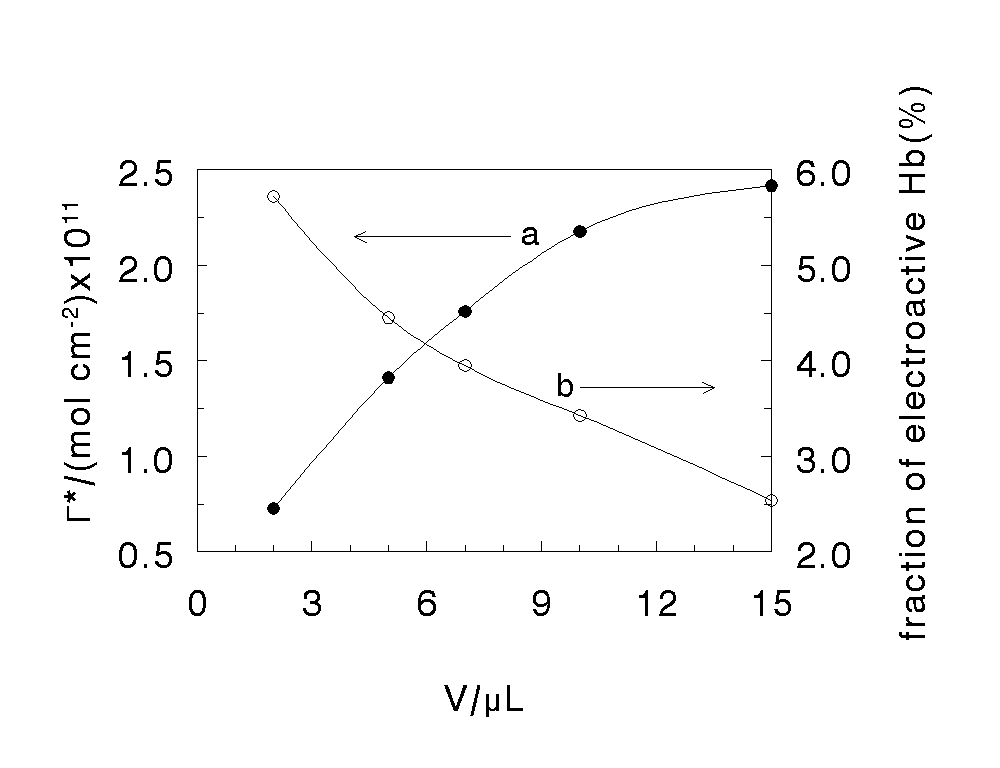


Fig. S5. Influence of the deposited volume of Hb-Fe3O4 mixture with a constant ratio of Hb/Fe3O4 on (a) the surface concentration of electroactive Hb (*) and (b) the fractions of electroactive Hb among the total deposited Hb for Hb-Fe3O4 films.


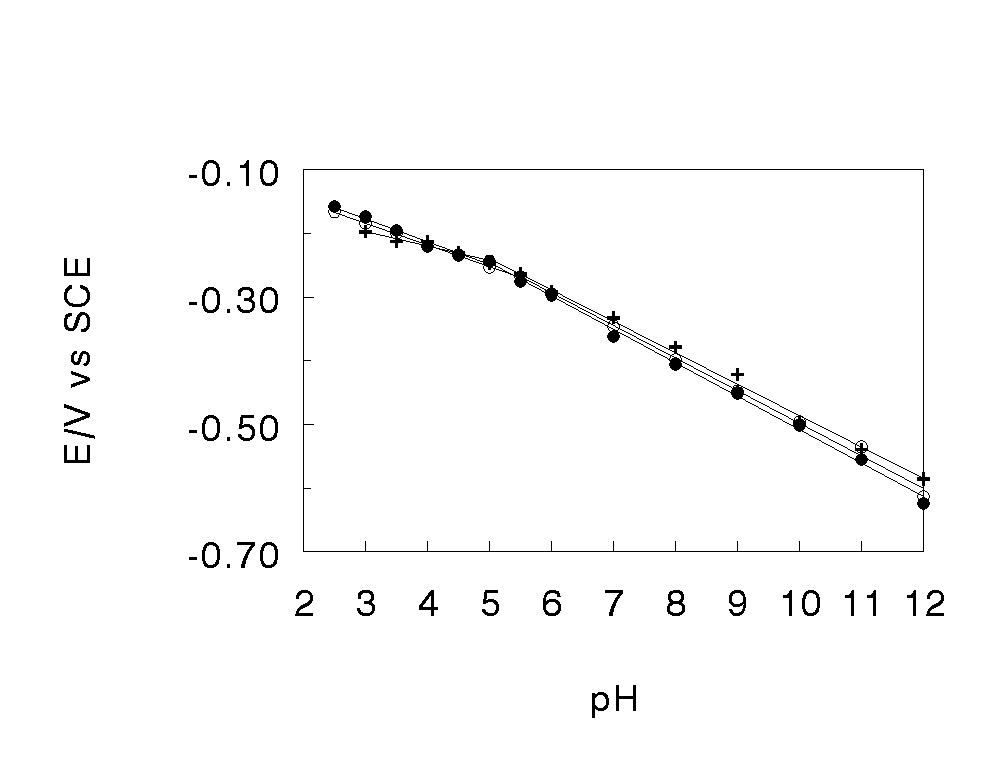


Fig. S6 Influence of pH on the formal potential of Hb-Fe3O4 (), Mb-Fe3O4 (o), and HRP-Fe3O4 (+) film electrodes estimated by CV at 0.2 V s-1.
